# Supplementary material
Source: HighWire-hosted journal article supplement (http://molpharm.aspetjournals.org/highwire/filestream/77295/field_highwire_adjunct_files/0/Supplemental_Data__MOL_95679_REV.pdf)

**Supplemental Data**

**S-adenosylmethionine and Methylthioadenosine Inhibit Beta Catenin  
Signaling by Multiple Mechanisms in Liver and Colon Cancer**

**Tony W.H. Li, Hui Peng, Heping Yang, Steven Kurniawidjaja, Parizad Panthaki, Yuhua  
Zheng, José M. Mato, and Shelly C. Lu**

Division of Gastroenterology, Cedars Sinai Medical Center, Los Angeles, California 90048  
(T.W.H.L., H.P., H.Y., S.C.L.); USC Research Center for Liver Diseases, Keck School of  
Medicine USC, Los Angeles, California 90033 (T.W.H.L., H.P., H.Y., S.K., P.P., S.C.L.);  
Department of Pediatric Gastroenterology, Hepatology and Nutrition, Children's Hospital Los  
Angeles (Y.Z.); CIC bioGUNE, Ciberehd, Technology Park of Bizkaia, 48160 Derio, Bizkaia,  
Spain (J.M.M.)

**Journal: Molecular Pharmacology**

**Supplemental Figure 1. Beta catenin levels were unchanged in normal livers of mice fed exogenous SAME or MTA.** Three-month old C57BL/6 male mice were fed either 150mg/kg/day SAME or 75mg/kg/day of MTA for 6 days via their water supply. Western blot analysis of beta catenin expression in the livers of three DMSO (0.2%) control mice compared to four SAME and four MTA fed mice. The graph below the blots represents the fold difference of beta catenin protein levels over the DMSO fed control mice, normalized to beta actin.

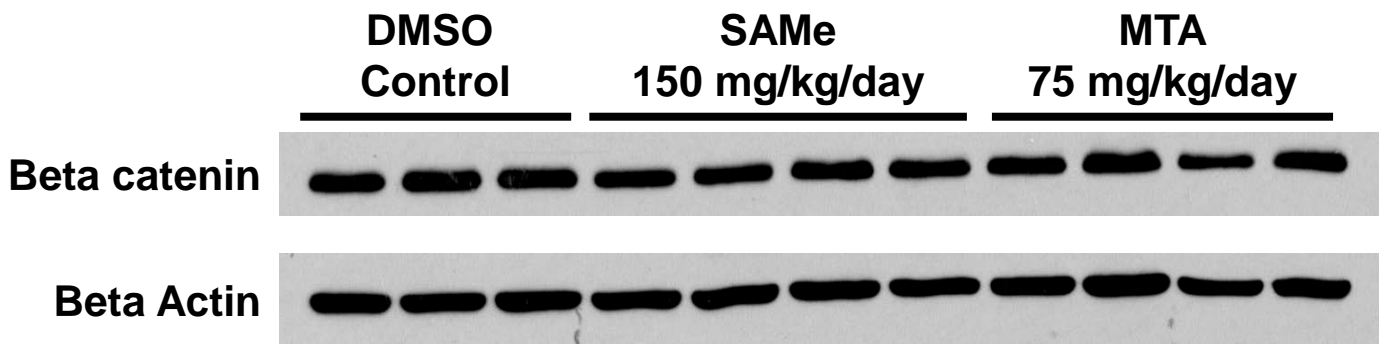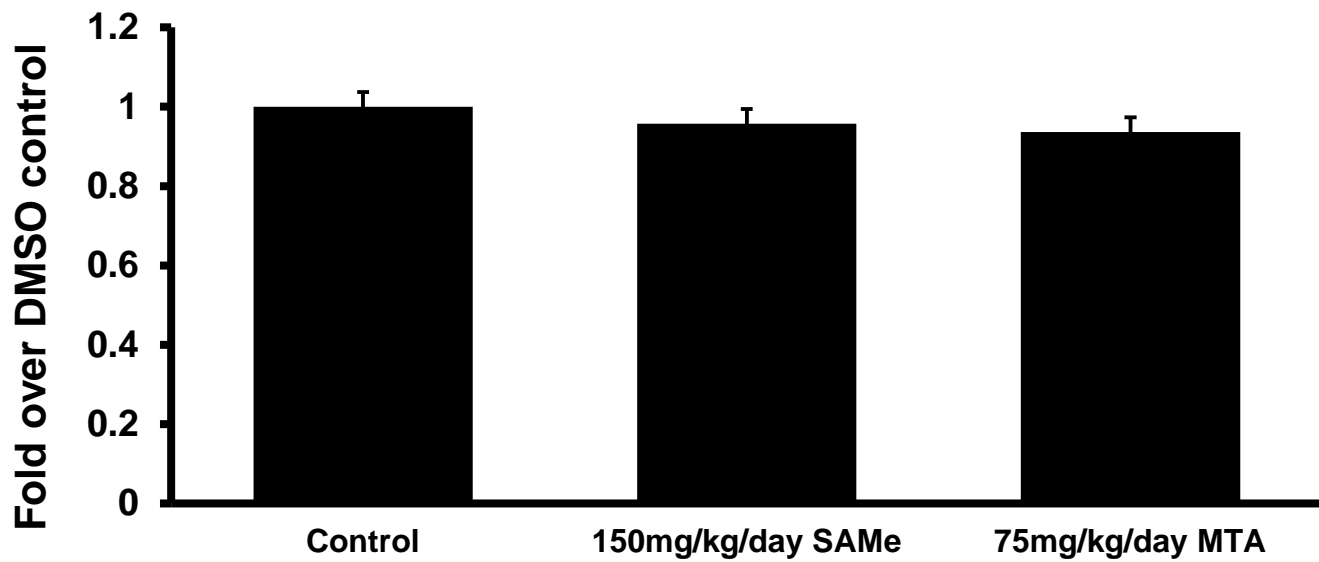

Supplement: Supplemental_Data__MOL_95679_REV.pdf [file Supplemental_Data__MOL_95679_REV.pdf]
